# Supplementary material
Source: MDPI journal article supplement (https://www.mdpi.com/2225-1154/11/2/30)
Supplement: s1 [file s1]

## Supplementary Material

**Table S1** Total number of cardiovascular disease deaths and daily median levels of the air pollutants (lag0-1) on days with low, moderate and high Tapp levels (lag0-1) in Cape Town, South Africa, 1 January 2006 – 31 December 2015 (3652 days).

| Variable                               | Low Tapp<br>(907 days) | Moderate Tapp<br>(1814 days) | High Tapp<br>(907 days) |
|----------------------------------------|------------------------|------------------------------|-------------------------|
| Total (n=20376)                        | 6464                   | 9783                         | 3985                    |
| Females (n= 9063)                      | 2914                   | 4328                         | 1751                    |
| Males (n= 11270)                       | 3536                   | 5433                         | 2227                    |
| 15-64 year olds (n= 9735)              | 2990                   | 4776                         | 1905                    |
| ≥65 year olds (n= 10588)               | 3457                   | 4984                         | 2067                    |
| PM <sub>10</sub> (µg.m <sup>-3</sup> ) | 26.5                   | 27.1                         | 30.5                    |
| NO <sub>2</sub> (µg.m <sup>-3</sup> )  | 19.0                   | 14.3                         | 11.5                    |
| SO <sub>2</sub> (µg.m <sup>-3</sup> )  | 9.5                    | 7.9                          | 7.4                     |

Abbreviations: PM<sub>10</sub>: particulate matter with an aerodynamic diameter less or equal to 10 µm; NO<sub>2</sub>: nitrogen dioxide, SO<sub>2</sub>: sulphur dioxide; Tapp: apparent temperature

Tapp data missing on 24 days

High Tapp: > 75<sup>th</sup> percentile (20.3°C); Low Tapp: < 25<sup>th</sup> percentile (12.6°C); Moderate Tapp: ≥ 25<sup>th</sup> and ≤ 75<sup>th</sup> percentile

There was a significant difference between the daily median levels of the air pollutants (lag0-1) on days with low, moderate and high Tapp levels (lag0-1), p<0.001. The air pollutant levels did not have Gaussian distributions and the non-parametric Wilcoxon Rank Sum test was applied.

**Table S2** Broad group for underlying causes of cardiovascular diseases mortality in Cape Town, South Africa, 1 January 2006 – 31 December 2015 (3652 days)

| Underlying Broad Group                                                                 | Frequency | Percent % |
|----------------------------------------------------------------------------------------|-----------|-----------|
| I00-I02 Acute rheumatic fever                                                          | 27        | 0.1       |
| I05-I09 Chronic rheumatic heart diseases                                               | 381       | 0.7       |
| I10-I15 Hypertensive diseases                                                          | 10193     | 18.8      |
| I20-I25 Ischemic heart diseases                                                        | 16894     | 31.1      |
| I26-I28 Pulmonary heart disease                                                        | 1408      | 2.6       |
| I30-I52 Other forms of heart disease                                                   | 8881      | 16.3      |
| I60-I69 Cerebrovascular diseases                                                       | 14411     | 26.5      |
| I70-I79 Diseases of arteries, arterioles and capillaries                               | 1750      | 3.2       |
| I80-I89 Diseases of veins, lymphatic vessels and lymph nodes, not elsewhere classified | 351       | 0.7       |
| I95-I99 Other and unspecified disorders of the circulatory system                      | 60        | 0.1       |

**Table S3** Spearman rank correlation coefficients between air pollution and weather variables at low, moderate and high Tapp levels in Cape Town, South Africa, 1 January 2006 – 31 December 2015 (3652 days).

| Variable         | NO <sub>2</sub> | SO <sub>2</sub> |
|------------------|-----------------|-----------------|
| Low Tapp         |                 |                 |
| PM <sub>10</sub> | 0.513           | 0.375           |
| NO <sub>2</sub>  |                 | 0.501           |
| Moderate Tapp    |                 |                 |
| PM <sub>10</sub> | 0.339           | 0.230           |
| NO <sub>2</sub>  |                 | 0.447           |
| High Tapp        |                 |                 |
| PM <sub>10</sub> | 0.381           | 0.303           |
| NO <sub>2</sub>  |                 | 0.467           |

Abbreviations: PM<sub>10</sub>: particulate matter with an aerodynamic diameter less or equal to 10 µm; NO<sub>2</sub>: nitrogen dioxide, SO<sub>2</sub>: sulphur dioxide; Tapp: apparent temperature

All correlations were significant ( $p < 0.0001$ )

High Tapp: > 75<sup>th</sup> percentile (20.3°C); Low Tapp: < 25<sup>th</sup> percentile (12.6°C); Moderate Tapp: ≥ 25<sup>th</sup> and ≤ 75<sup>th</sup> percentile

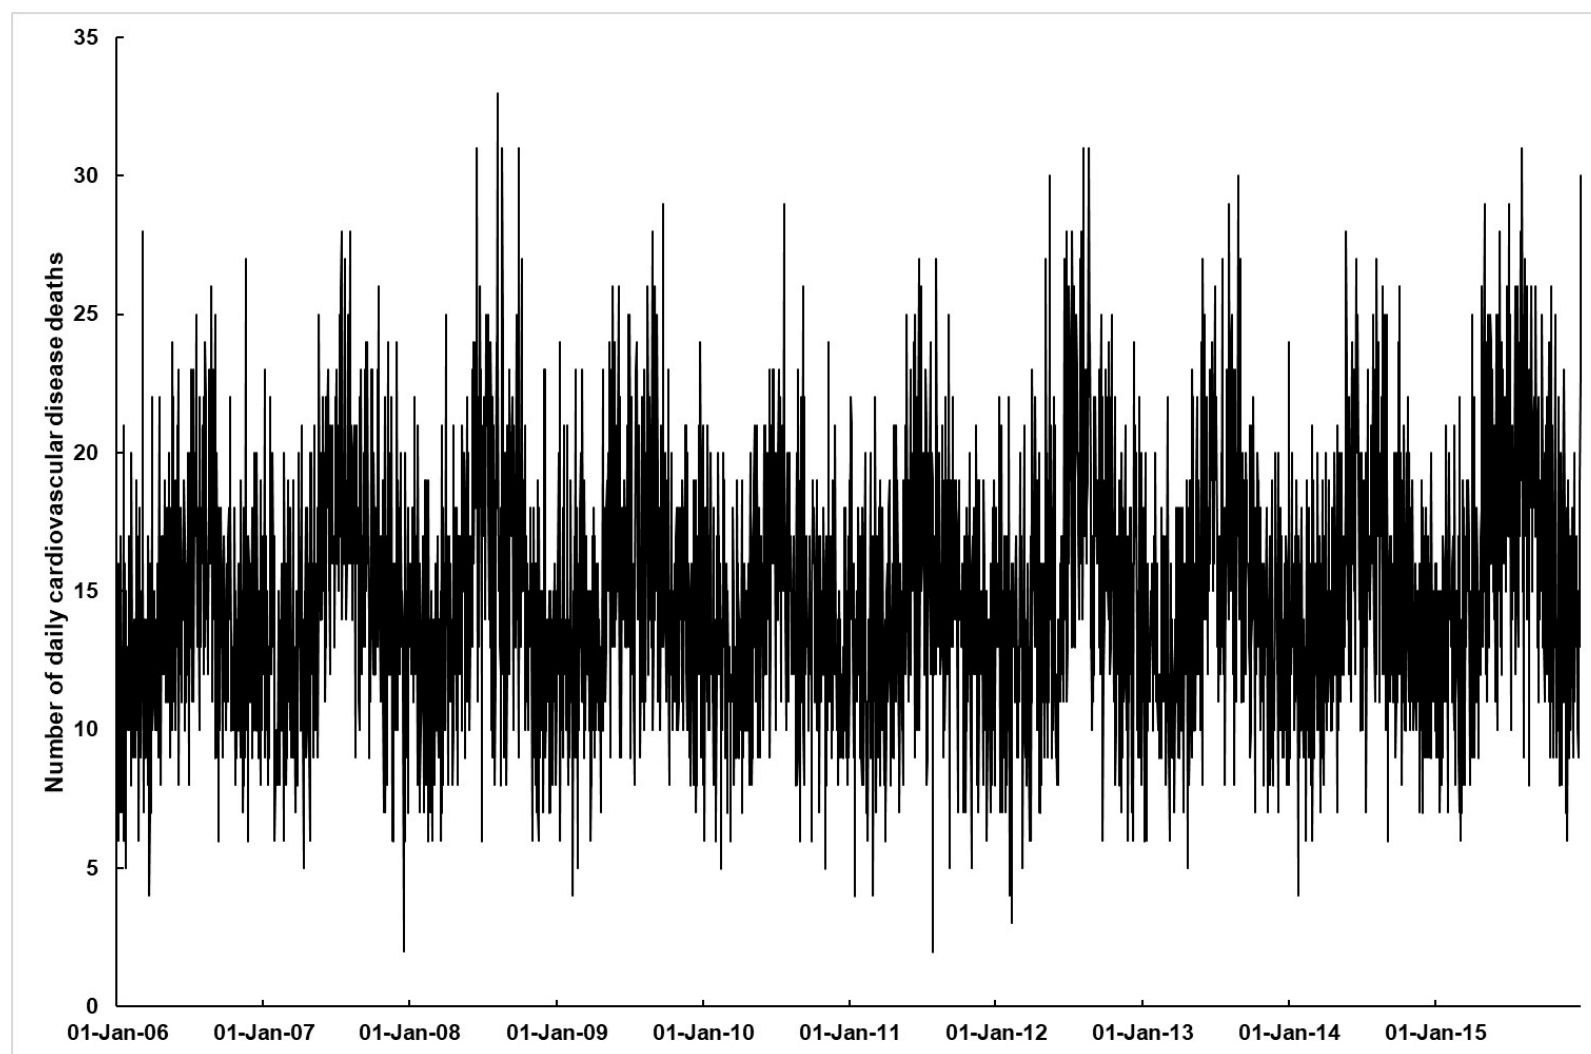

**Figure S1.** Time-series of the daily number of cardiovascular disease deaths in Cape Town, South Africa during 1 January 2006 to 31 December 2015.

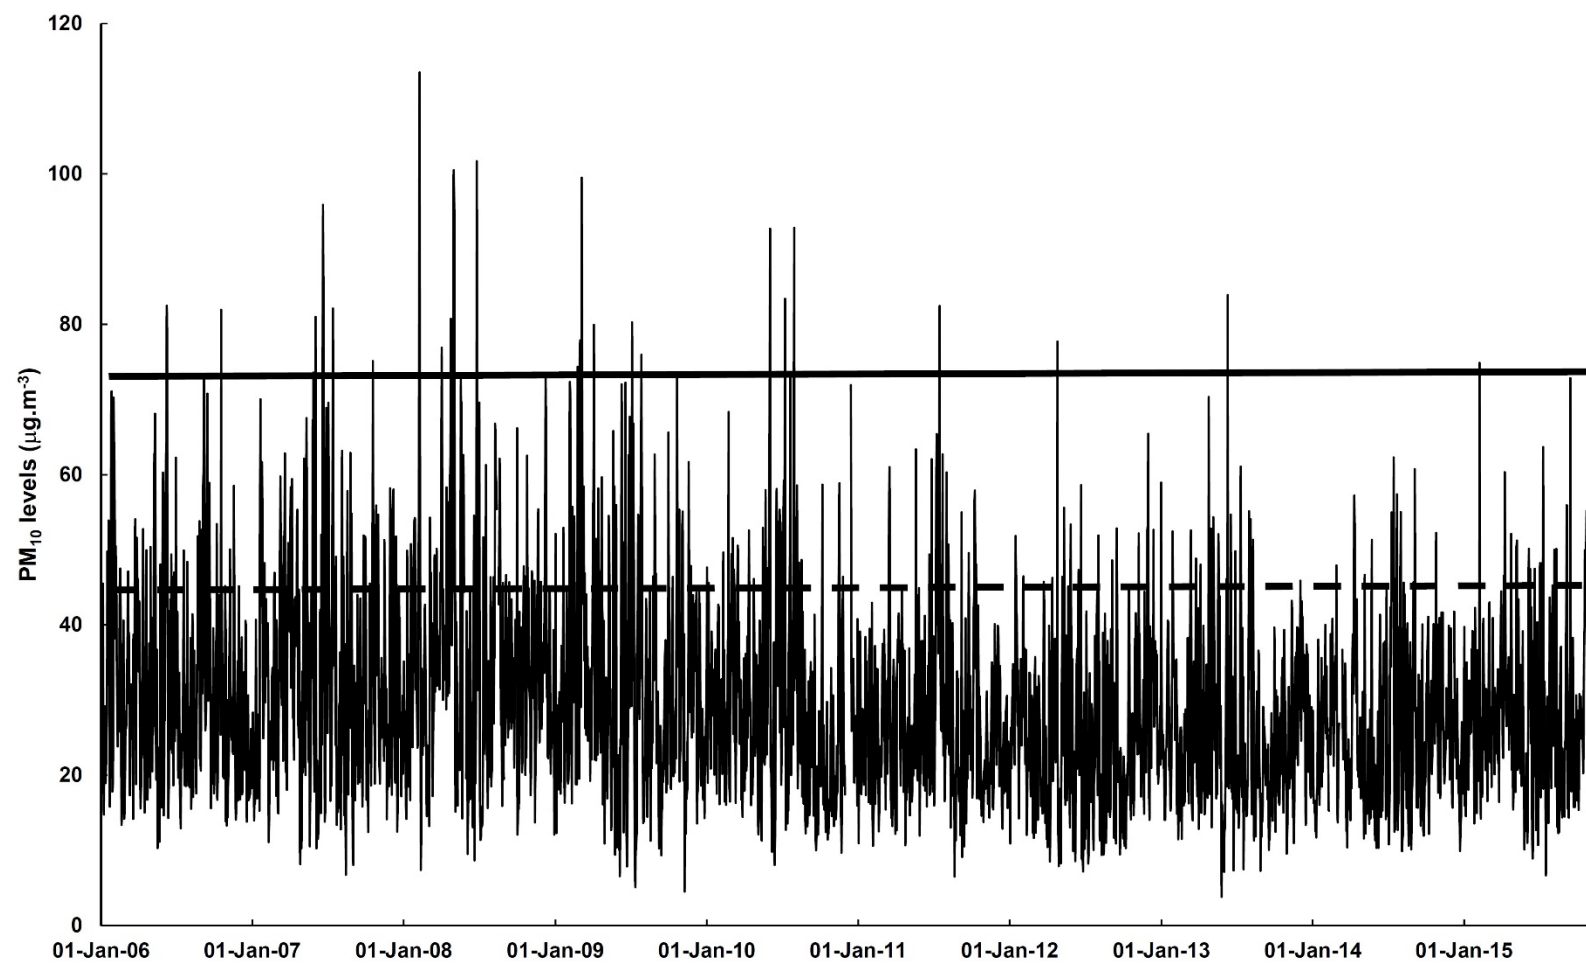

**Figure S2** Time-series of PM<sub>10</sub> levels in Cape Town, South Africa during 1 January 2006 to 31 December 2015.

Dotted line: Daily WHO guideline, Solid bold line: Daily South African standard

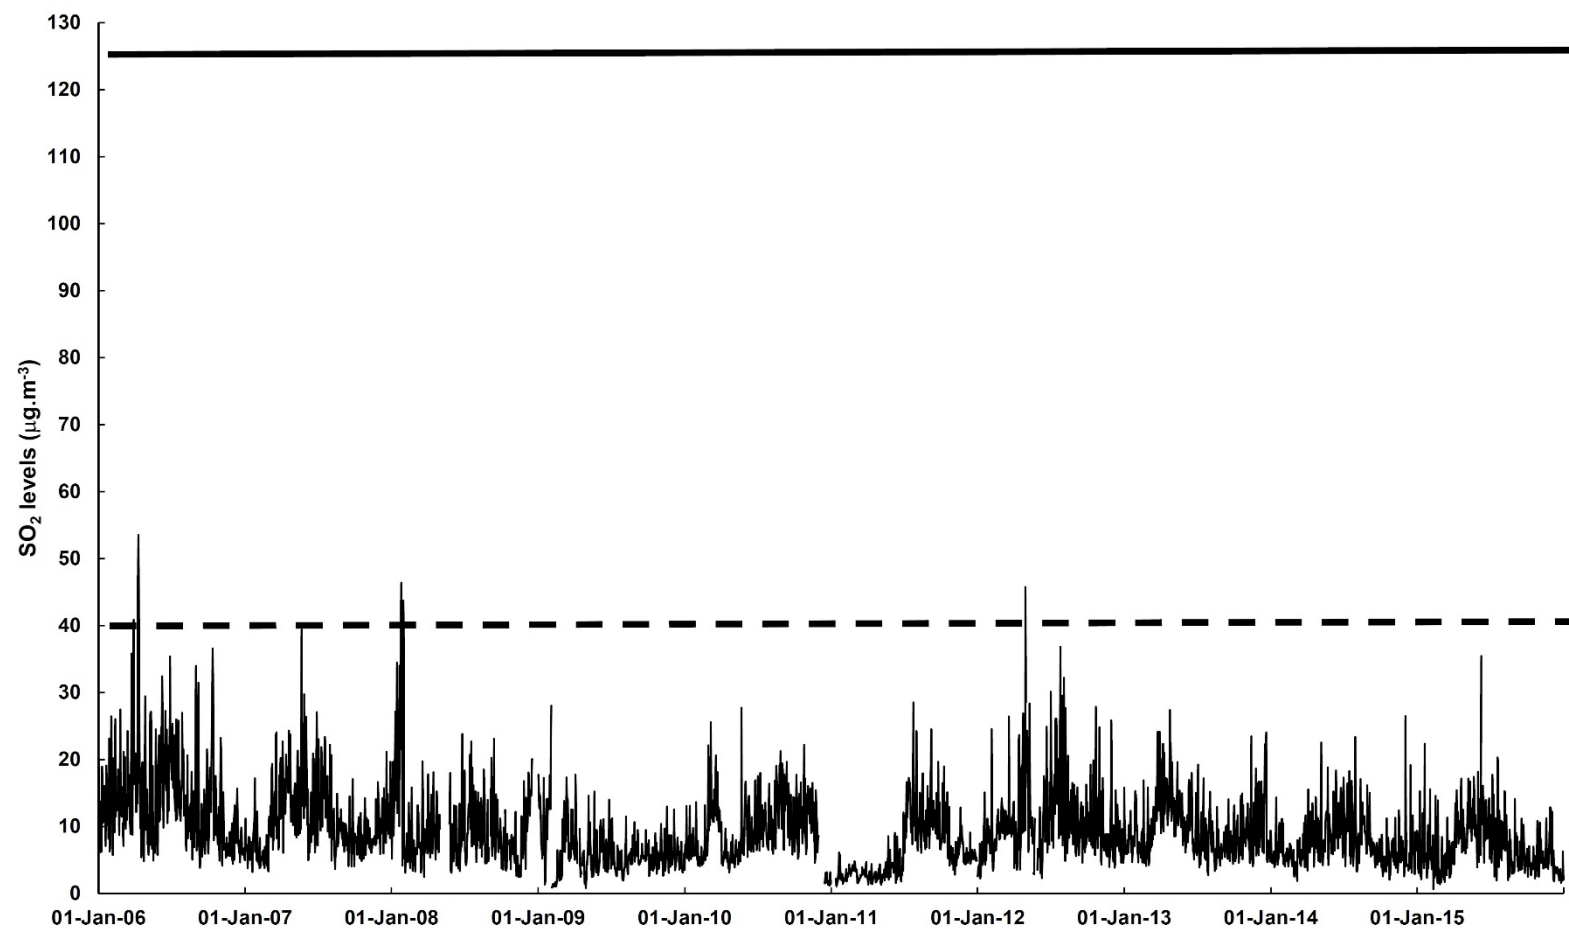

**Figure S3** Time-series of SO<sub>2</sub> levels in Cape Town, South Africa during 1 January 2006 to 31 December 2015.

Dotted line: Daily WHO guideline, Solid bold line: Daily South African standard

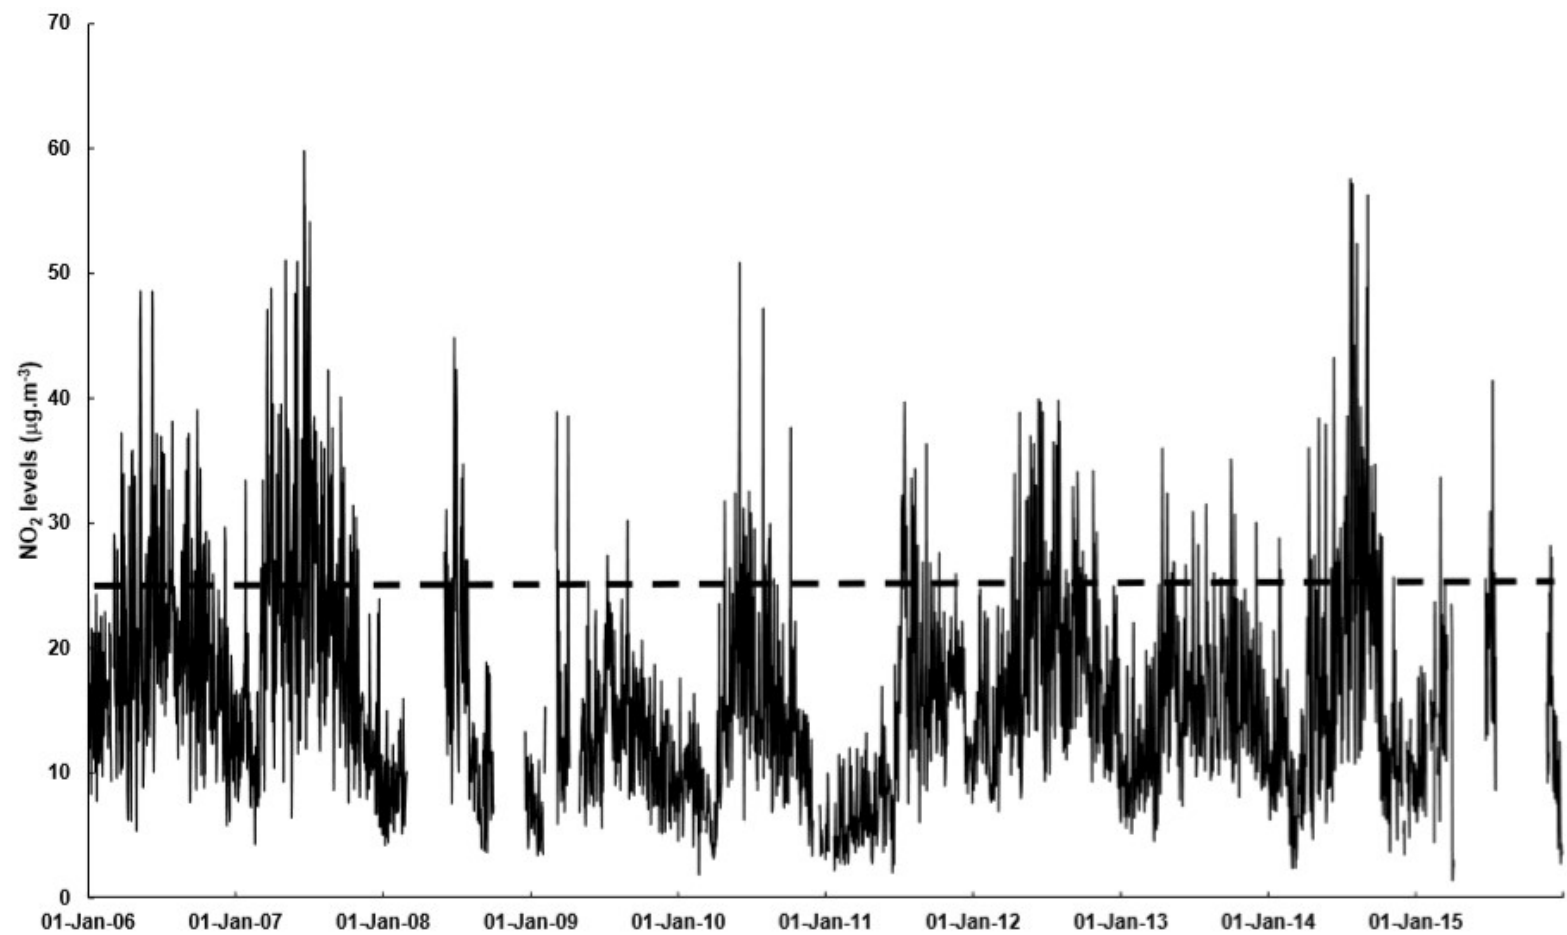

**Figure S4** Time-series of NO<sub>2</sub> levels in Cape Town, South Africa during 1 January 2006 to 31 December 2015.  
No South African daily air quality standard for NO<sub>2</sub>

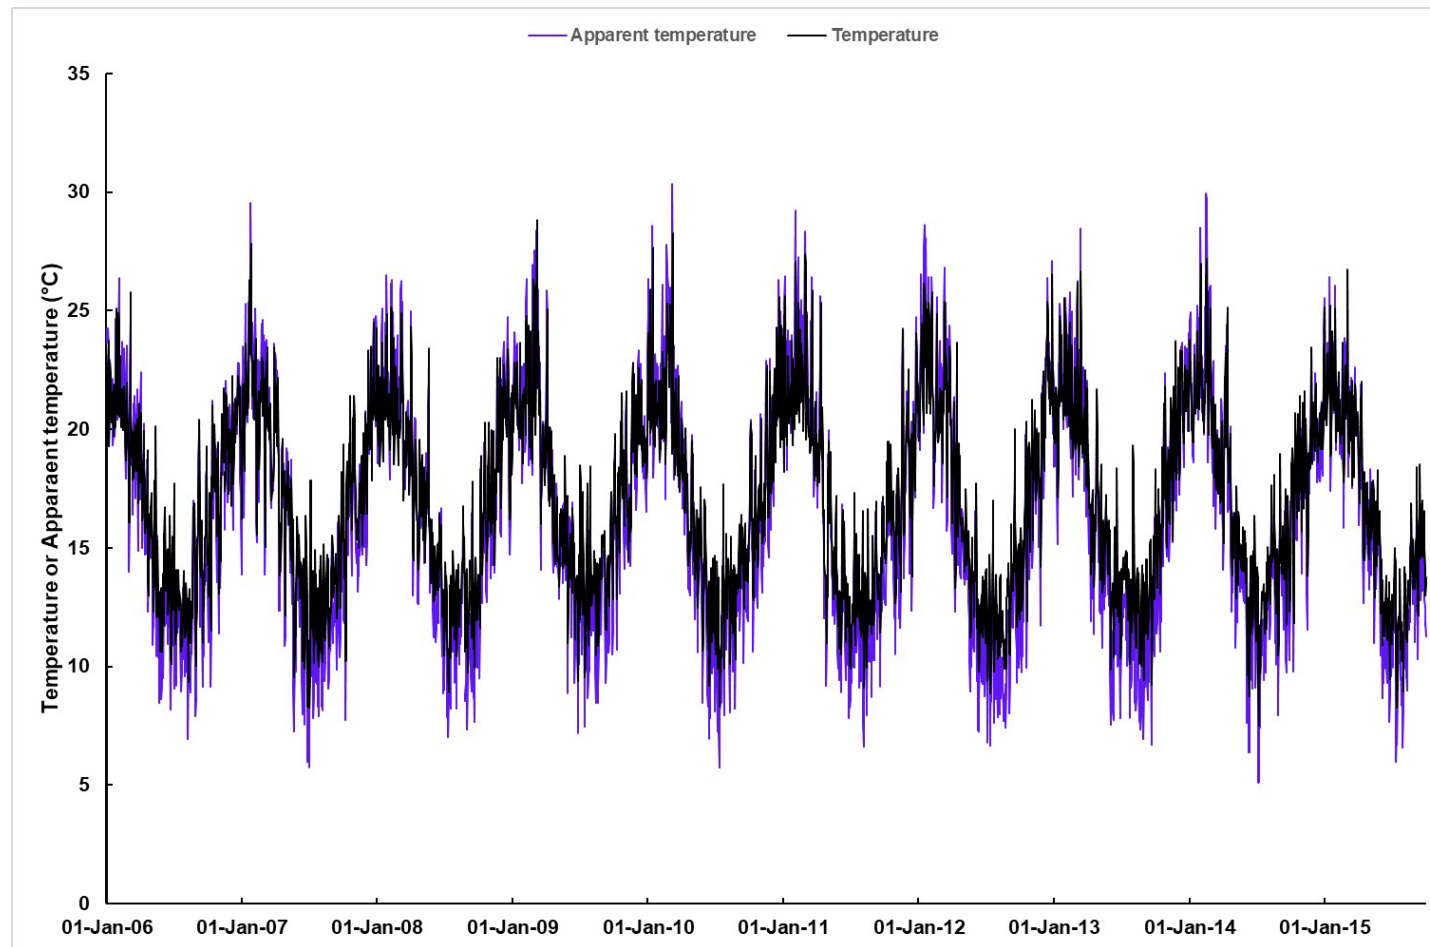

**Figure S5** Time-series of apparent temperature and temperature in Cape Town, South Africa during 1 January 2006 to 31 December 2015.

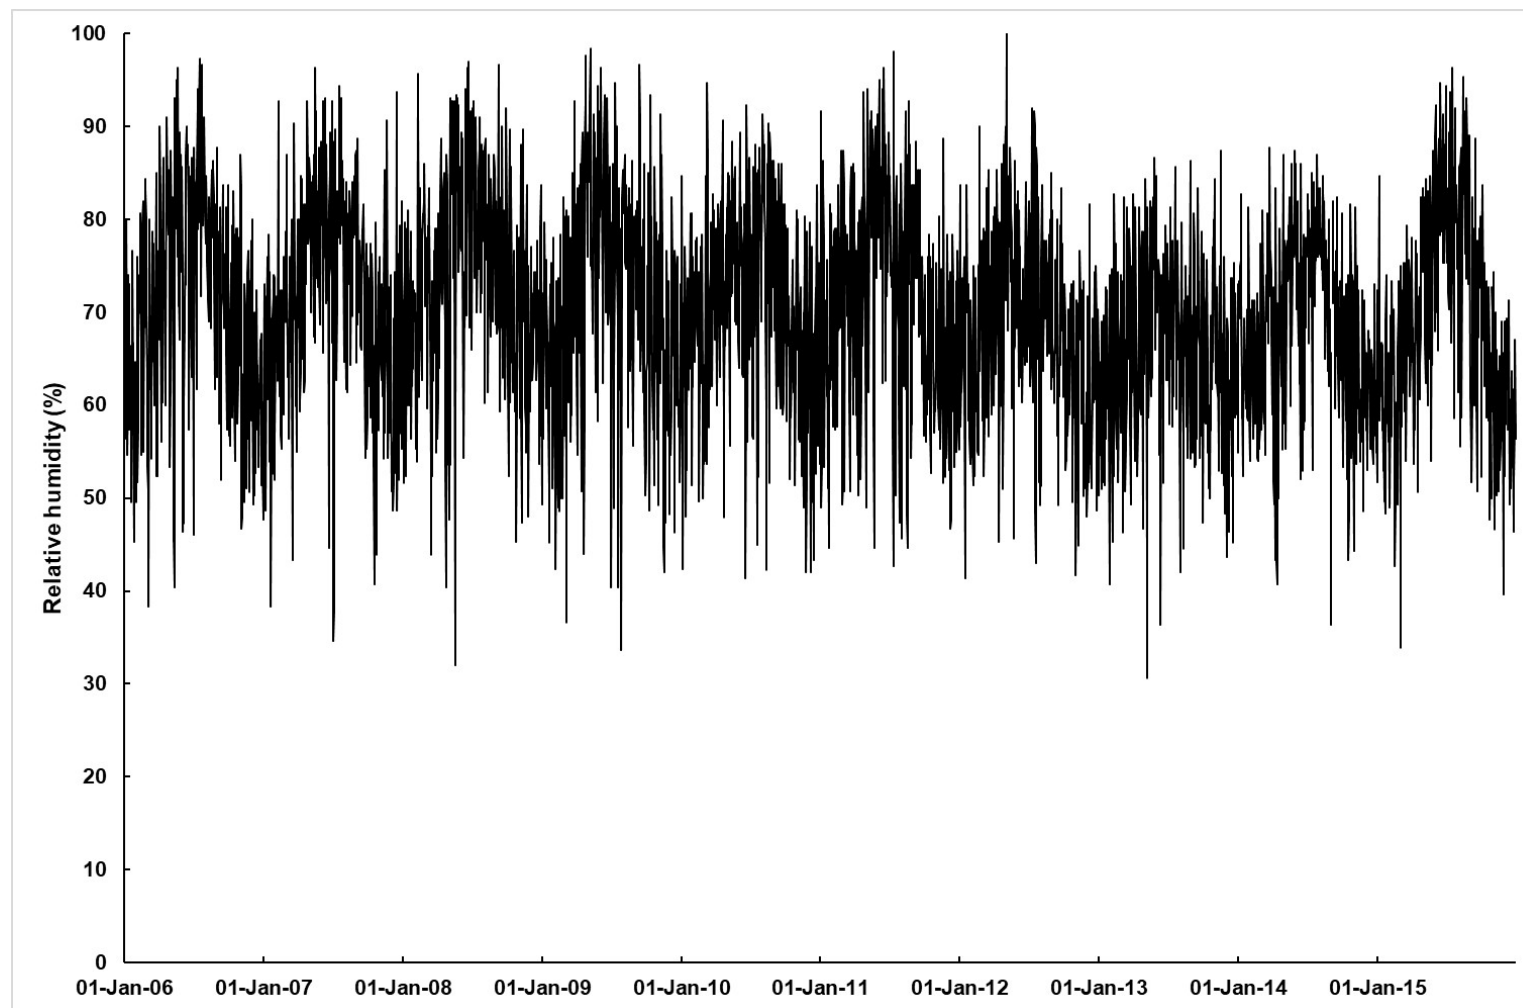

**Figure S6** Time-series of relative humidity in Cape Town, South Africa during 1 January 2006 to 31 December 2015
